# Supplementary material for: Selection of essential medicines for the prevention and treatment of cardiovascular diseases in low and middle income countries
Source: Springer Nature journal article supplement (doi:10.1186/s12872-018-0858-5), 2018-06-25
Supplement: MOESM1 [file 15878300]

## Annex 1 - Overview of the countries included in the study

| Country                         | WB income level     | WHO region            | Year of (latest update) Essential Medicines List |
|---------------------------------|---------------------|-----------------------|--------------------------------------------------|
| <b>Afghanistan</b>              | low income          | Eastern Mediterranean | 2007                                             |
| <b>Argentina</b>                | upper middle income | America               | 2005                                             |
| <b>Armenia</b>                  | lower middle income | Europe                | 2010                                             |
| <b>Cameroon</b>                 | lower middle income | Africa                | 2009                                             |
| <b>Central African Republic</b> | low income          | Africa                | 2009                                             |
| <b>Chad</b>                     | low income          | Africa                | 2007                                             |
| <b>China</b>                    | upper middle income | Western Pacific       | 2009                                             |
| <b>Dominican Republic</b>       | upper middle income | America               | 2005                                             |
| <b>Ecuador</b>                  | upper middle income | America               | 2009                                             |
| <b>El Salvador</b>              | lower middle income | America               | 2011                                             |
| <b>Eritrea</b>                  | low income          | Africa                | 2010                                             |
| <b>India</b>                    | lower middle income | South-East Asia       | 2011                                             |
| <b>Jamaica</b>                  | upper middle income | America               | 2008                                             |
| <b>Jordan</b>                   | upper middle income | Eastern Mediterranean | 2009                                             |
| <b>Kiribati</b>                 | lower middle income | Western Pacific       | 2009                                             |
| <b>Malaysia</b>                 | upper middle income | Western Pacific       | 2008                                             |
| <b>Maldives</b>                 | upper middle income | South-East Asia       | 2009                                             |
| <b>Mali</b>                     | low income          | Africa                | 2008                                             |
| <b>Morocco</b>                  | lower middle income | Eastern Mediterranean | 2008                                             |
| <b>Namibia</b>                  | upper middle income | Africa                | 2008                                             |
| <b>Nicaragua</b>                | lower middle income | America               | 2009                                             |
| <b>Pakistan</b>                 | lower middle income | Eastern Mediterranean | 2007                                             |
| <b>Palau</b>                    | upper middle income | Western Pacific       | 2006                                             |
| <b>Peru</b>                     | upper middle income | America               | 2010                                             |
| <b>Seychelles</b>               | upper middle income | Africa                | 2010                                             |
| <b>Solomon Islands</b>          | lower middle income | Western Pacific       | 2010                                             |
| <b>Sri Lanka</b>                | lower middle income | South-East Asia       | 2009                                             |
| <b>Sudan</b>                    | lower middle income | Africa                | 2007                                             |
| <b>Suriname</b>                 | upper middle income | America               | 2014                                             |
| <b>Thailand</b>                 | upper middle income | South-East Asia       | 2008                                             |
| <b>Tonga</b>                    | upper middle income | Western Pacific       | 2007                                             |
| <b>Tuvalu</b>                   | upper middle income | Western Pacific       | 2008                                             |
| <b>Uganda</b>                   | low income          | Africa                | 2007                                             |
| <b>Uruguay</b>                  | upper middle income | America               | 2011                                             |
